# Supplementary material for: Analysis of drugs of abuse in biofluids by low temperature plasma (LTP) ionization mass spectrometry
Source: Royal Society of Chemistry journal article supplement (doi:10.1039/b920155f), 2010-01-01
Supplement: b920155f.pdf [file b920155f.pdf]

## Supporting Information

# Analyses of Drugs of Abuse in Biofluids and Solid Matrices by Low Temperature Plasma (LTP) Ionization Mass Spectrometry

Ayanna U. Jackson,<sup>1</sup> Juan F. Garcia-Reyes,<sup>1,2</sup> Jason D. Harper,<sup>3</sup> Josh Wiley,<sup>1</sup> Antonio Molina-Díaz,<sup>2</sup> Zheng Ouyang,<sup>3</sup> and R. Graham Cooks<sup>1</sup>

<sup>1</sup> Department of Chemistry and Center for Analytical Instrumentation Development (CAID), Purdue University, West Lafayette, IN, USA

<sup>2</sup> Analytical Chemistry Research Group, Department of Physical and Analytical Chemistry, University of Jaen, 23071 Jaen, Spain

<sup>3</sup> Weldon School of Biomedical Engineering, Purdue University, West Lafayette, IN, USA

**Abstract:** The structures of the analytes as well as details of the referenced liquid chromatography method used to confirm the LTP-MS/MS analysis of real samples is provided. The decay profile of the caffeine metabolism is provided. Results of the LC-MS confirmation for the detection of cocaine within a hair extract are presented.

***Liquid Chromatography Electrospray Mass Spectrometry Reference Method***

A Zorbax HT XDB-C<sub>18</sub> analytical column of the following dimensions: 4.6 mm x 50 mm and 1.8 µm particle size (Agilent Technologies) was used in the HPLC analysis. The mobile phases used were water with 0.1% formic acid (A) and acetonitrile (B). The chromatographic method held the initial mobile phase composition (10% B) constant for 3 min, followed by a linear gradient to 100% B up to 15 min and kept for 5 min at 100% B. The flow rate used was 0.5 mLmin<sup>-1</sup>. The HPLC system was connected to a time-of-flight mass spectrometer (Agilent 6220 accurate mass TOF, Agilent Technologies, Santa Clara, CA, USA) equipped with an electrospray interface operating in positive ion mode using the following operating parameters: capillary voltage 4000 V; nebulizer pressure 40 psig; drying gas flow rate 9.0 L min<sup>-1</sup>; gas temperature 325° C; skimmer voltage 65 V; octapole 1 rf 250 V; fragmenter voltage 190 V. LC-MS accurate mass spectra were recorded across the range of  $m/z$  50-1000.

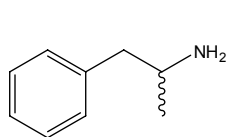

**Amphetamine**  
mw 135 g/mol

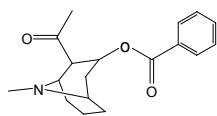

**Benzoylcegonine**  
mw 290 g/mol

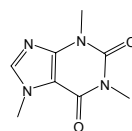

**Caffeine**  
mw 194 g/mol

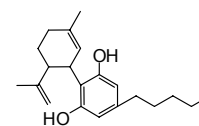

**Cannabidiol**  
mw 314 g/mol

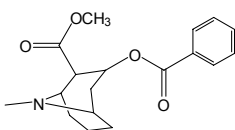

**Cocaine**  
mw 303 g/mol

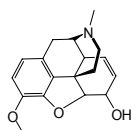

**Codeine**  
mw 299 g/mol

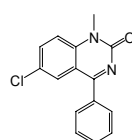

**Diazepam**  
mw 284 g/mol

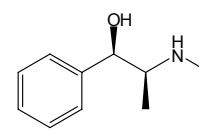

**Ephedrine**  
mw 165 g/mol

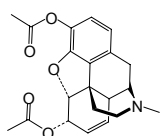

**Heroin**  
mw 369 g/mol

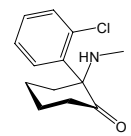

**Ketamine**  
mw 237 g/mol

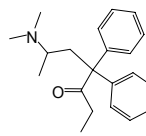

**Methadone**  
mw 309 g/mol

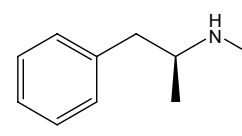

**Methamphetamine**  
mw 149 g/mol

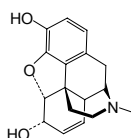

**Morphine**  
mw 285 g/mol

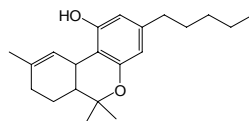

**Δ9 – THC**  
mw 314 g/mol

**Figure S1.** Structure and nominal mass of drugs of abuse

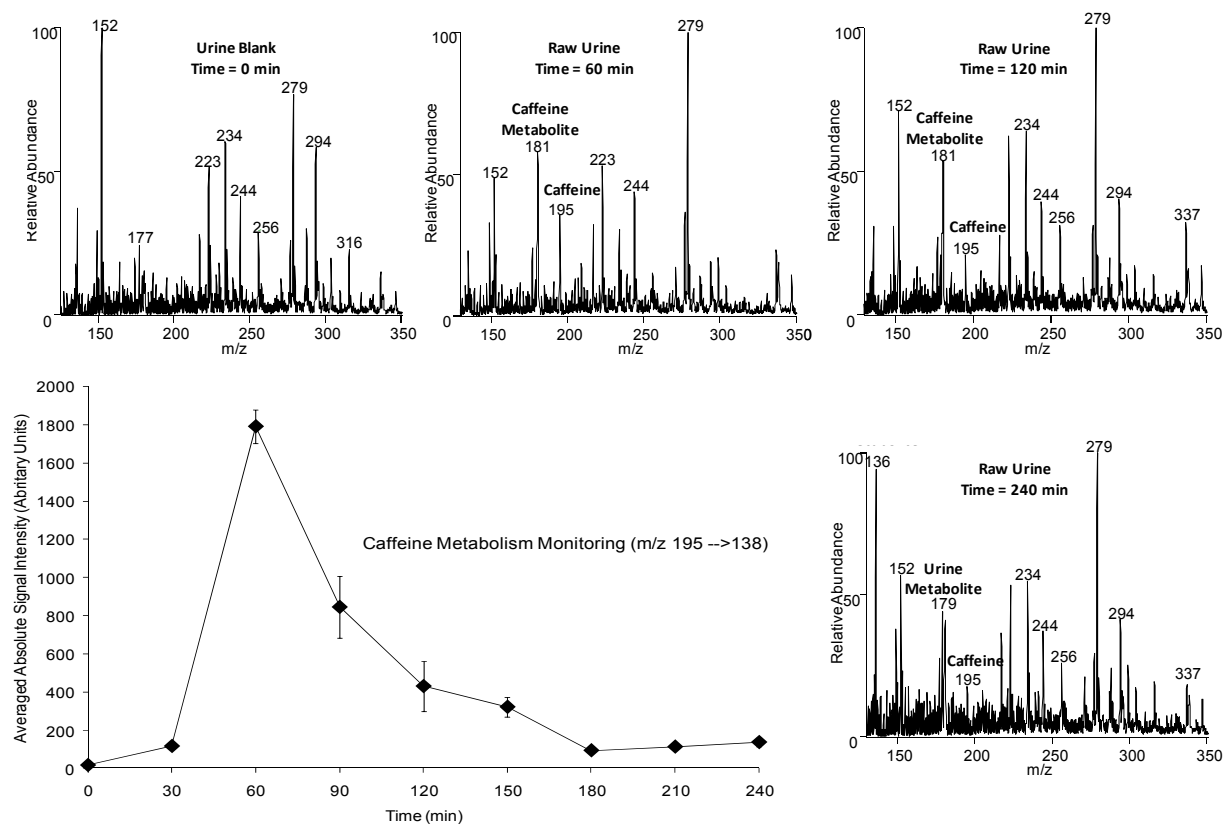

**Figure S2.** Direct monitoring of caffeine ( $m/z$  195) in raw urine after consumption of a caffeinated drink. The full mass spectra ( $m/z$  125 – 350) at different time points in the decay profile are presented. The decay profile is a generated based on the LTP-MS/MS monitoring of caffeine's major fragment ion ( $m/z$  195  $\rightarrow$  138).

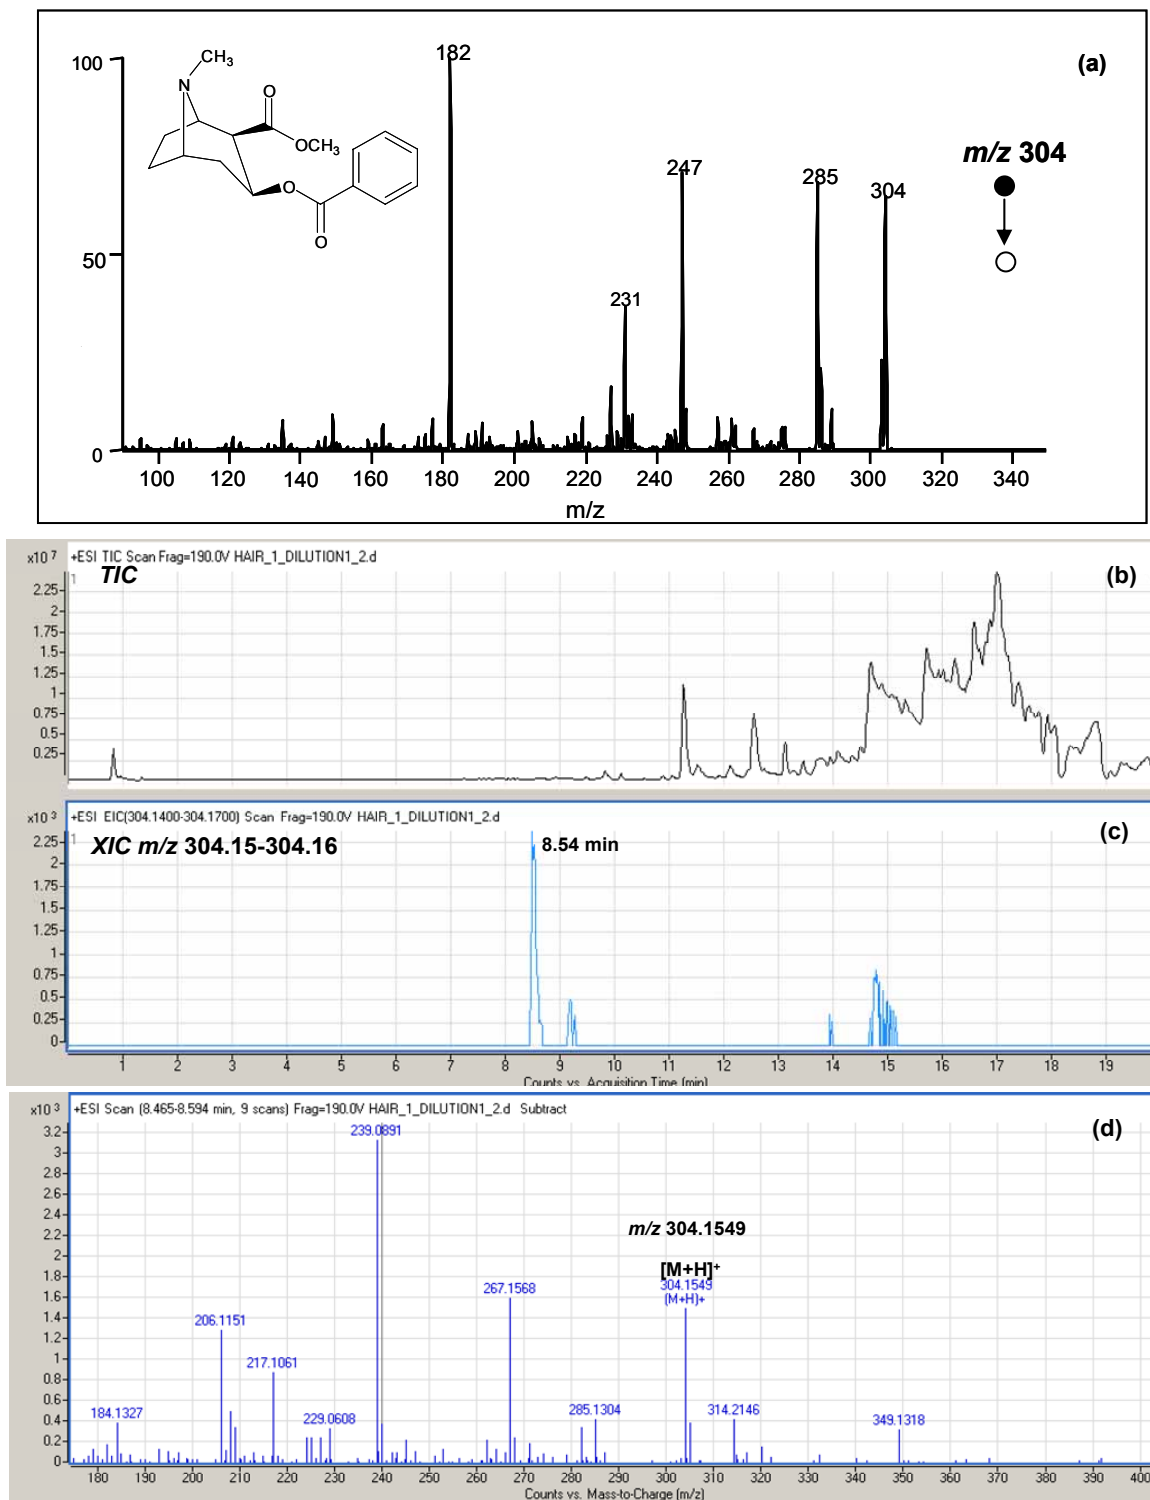

**Figure S3.** a) LTP-MS/MS detection of cocaine ( $m/z$  304  $\rightarrow$  182) in a hair extract containing 1.4 pg by LC-MS analysis; b) total ion chromatogram obtained from the LC-TOFMS analysis of the studied hair extract; c) extracted ion chromatogram ( $m/z$  304.15 – 304.16); the retention time of cocaine is 8.50 min; d) Accurate mass spectrum at 8.50 min. The experimental spectrum shows a peak with  $m/z$  304.1549 (theoretical mass spectrum of cocaine: 304.1543)
